# Supplementary material
Source: publisher site journal article supplement (https://www.dovepress.com/article/598765)
Supplement: Supplementary file 1 [file 598765%20Revised%20Supplementary%20Materials.docx]

**SUPPLEMENTARY MATERIAL**

**Tables**

**Table S1.** Research strategy in database PubMed (17 May 2024).

| **Key-words** | **Search identification** | **Search Term** | **Result** |
| --- | --- | --- | --- |
| Group Α | 1 | Continuous Glucose Monitoring [Mesh] | 136 |
|  | 2 | Continuous Glucose Monitoring [Text Word] | 7,115 |
|  | 3 | Glucose Monitoring [Text Word] | 11,525 |
|  | 4 | Real-time continuous glucose monitoring [Text Word] | 459 |
|  | 5 | Intermittent-scanning continuous glucose monitoring [Text Word] | 21 |
|  | 6 | Flash glucose monitor [Text Word] OR CGM flash[Text Word] | 39 |
|  | 7 | "CGM"[Text Word] OR "cgm devices"[Text Word] OR "cgm sensors"[Text Word] OR "diabetes technology"[Text Word] | 5,099 |
|  | 8 | "Continuous glucose monitoring"[MeSH Terms] OR "continuous glucose monitoring"[Text Word] OR "glucose monitoring"[Text Word] OR "real time continuous glucose monitoring"[Text Word] OR "intermittent scanning continuous glucose monitoring"[Text Word] OR "flash glucose monitor"[Text Word] OR "cgm flash"[Text Word] OR "CGM"[Text Word] OR "cgm devices"[Text Word] OR "cgm sensors"[Text Word] OR "diabetes technology"[Text Word] | 13,013 |
| Group B | 9 | Education [MeSH Terms] | 17,357 |
|  | 10 | (Education program [Text Word]) OR (Training program[Text Word]) | 44,249 |
|  | 11 | (Education intervention [Text Word]) OR (Training intervention [Text Word]) | 6,527 |
|  | 12 | (Structured education program [Text Word]) OR (Structured training program [Text Word]) | 266 |
|  | 13 | (Educational tool [Text Word]) OR (Training tool [Text Word]) | 4,025 |
|  | 14 | "educational status"[MeSH Terms] OR "Education"[MeSH Terms] OR ("education program"[Text Word] AND "training program"[Text Word]) OR ("education intervention"[Text Word] OR "training intervention"[Text Word]) OR ("structured education program"[Text Word] OR "structured training program"[Text Word]) OR ("educational tool"[Text Word] OR "training tool"[Text Word]) | 972,879 |
| Group C | 15 | Diabetes Mellitus, Type 1"[Mesh] | 88,546 |
|  | 16 | ((diabetes mellitus, type 1[Text Word]) OR (Type 1 diabetes[Text Word])) OR (type 1 diabetes mellitus[Text Word] | 104,334 |
|  | 17 | "diabetes mellitus, type 1"[MeSH Terms] OR "diabetes mellitus type 1"[Text Word] OR "type 1 diabetes"[Text Word] OR "type 1 diabetes mellitus"[Text Word] | 104,815 |
| Group Α + Β +C | 18 | ("continuous glucose monitoring"[MeSH Terms] OR "continuous glucose monitoring"[Text Word] OR "glucose monitoring"[Text Word] OR "real time continuous glucose monitoring"[Text Word] OR "intermittent scanning continuous glucose monitoring"[Text Word] OR ("flash glucose monitor"[Text Word] OR "cgm flash"[Text Word]) OR ("CGM"[Text Word] OR "cgm devices"[Text Word] OR "cgm sensors"[Text Word] OR "diabetes technology"[Text Word])) AND ("educational status"[MeSH Terms] OR "Education"[MeSH Terms] OR ("education program"[Text Word] AND "training program"[Text Word]) OR ("education intervention"[Text Word] OR "training intervention"[Text Word]) OR ("structured education program"[Text Word] OR "structured training program"[Text Word]) OR ("educational tool"[Text Word] OR "training tool"[Text Word])) AND ("diabetes mellitus, type 1"[MeSH Terms] OR ("diabetes mellitus type 1"[Text Word] OR "type 1 diabetes"[Text Word] OR "type 1 diabetes mellitus"[Text Word])) | 211 |
| Group Α + Β +C + Filters (Abstract, Full text, from 2016 – 2024) | 6 | (("continuous glucose monitoring"[MeSH Terms] OR "continuous glucose monitoring"[Text Word] OR "glucose monitoring"[Text Word] OR "real time continuous glucose monitoring"[Text Word] OR "intermittent scanning continuous glucose monitoring"[Text Word] OR ("flash glucose monitor"[Text Word] OR "cgm flash"[Text Word]) OR ("CGM"[Text Word] OR "cgm devices"[Text Word] OR "cgm sensors"[Text Word] OR "diabetes technology"[Text Word])) AND ("educational status"[MeSH Terms] OR "Education"[MeSH Terms] OR ("education program"[Text Word] AND "training program"[Text Word]) OR ("education intervention"[Text Word] OR "training intervention"[Text Word]) OR ("structured education program"[Text Word] OR "structured training program"[Text Word]) OR ("educational tool"[Text Word] OR "training tool"[Text Word])) AND ("diabetes mellitus, type 1"[MeSH Terms] OR ("diabetes mellitus type 1"[Text Word] OR "type 1 diabetes"[Text Word] OR "type 1 diabetes mellitus"[Text Word]))) AND ((fha[Filter]) AND (fft[Filter]) AND (2016:2024[pdat])) | 82 |

**Table S2.** Reaserch strategy in database PsycINFOlibrary (17 May 2024).

| **Search identification** | **Search Term** | **Result** |
| --- | --- | --- |
| S17 | S7 AND S12 AND S15+ limiters (linked Full Text; Publication Year: 2016-2024; English language) | 17 |
| S16 | S7 AND S12 AND S15 | 124 |
| S15 | S13 OR S14 | 17,018 |
| S14 | type 1 diabetes or diabetes type 1 or diabetes mellitus type 1 | 17,018 |
| S13 | MA diabetes type 1 | 2,030 |
| S12 | S8 OR S9 OR S10 OR S11 | 147,141 |
| S11 | educational tools | 2,658 |
| S10 | structured education program | 224 |
| S9 | education intervention or patient teaching or patient education | 38,614 |
| S8 | education program or training program or workshop | 111,161 |
| S7 | S1 OR S2 OR S3 OR S4 OR S5 OR S6 | 1,206 |
| S6 | CGM OR cgm devices OR cgm sensors OR diabetes technology | 261 |
| S5 | flash glucose monitoring or fgm or freestyle libre or freestyle libre 2 | 305 |
| S4 | Intermittent-scanning continuous glucose monitoring | 684 |
| S3 | Real-time continuous glucose monitoring | 6 |
| S2 | continuous glucose monitoring or cgm or continuous glucose monitor | 209 |
| S1 | MA glucose monitoring | 313 |

**Table S3.** Search strategy in database CINAHLlibrary (17 May 2024).

| **Search identification** | **Search Term** | **Result** |
| --- | --- | --- |
| S13 | S7 AND S10 AND S11 + filters (full Text; Abstract Available; Publication Date: 20160501-20240531) | 13 |
| S12 | S7 AND S10 AND S11 | 20 |
| S11 | diabetes mellitus, type 1 OR Type 1 diabetes OR type 1 diabetes mellitus | 85,909 |
| S10 | S8 OR S9 | 6,494 |
| S9 | Educational tool OR Training tool | 5,593 |
| S8 | Structured education program OR Structured training program | 917 |
| S7 | S1 OR S2 OR S3 OR S4 OR S5 OR S6 | 3,040 |
| S6 | CGM OR cgm devices OR cgm sensors OR diabetes technology | 2,662 |
| S5 | Flash glucose monitor OR CGM flash | 54 |
| S4 | Intermittent-scanning continuous glucose monitoring | 5 |
| S3 | Real-time continuous glucose monitoring | 265 |
| S2 | continuous glucose monitoring systems | 574 |
| S1 | MH continuous glucose monitoring | 80 |

**Table S4.** Search strategy in database :Cochranelibrary(17 May 2024).

| **Search identification** | **Search Term** | **Result** |
| --- | --- | --- |
| #1 | MeSH descriptor: [Continuous Glucose Monitoring] explode all trees | 11 |
| #2 | ("continuous glucose monitoring system"):ti,ab,kw | 760 |
| #3 | (Real-time continuous glucose monitoring):ti,ab,kw | 541 |
| #4 | (Intermittent-scanning continuous glucose monitoring):ti,ab,kw | 100 |
| #5 | (Flash glucose monitor OR CGM flash):ti,ab,kw | 352 |
| #6 | (CGM OR cgm devices OR cgm sensors OR diabetes technology):ti,ab,kw | 5,007 |
| #7 | (#1 OR #2 OR #3 OR #4 OR #5 OR #6) | 5,871 |
| #8 | (Structured education program OR Structured training program):ti,ab,kw | 7,841 |
| #9 | (Educational tool OR Training tool):ti,ab,kw | 16,238 |
| #10 | (#8 OR #9) | 23,200 |
| #11 | MeSH descriptor: [Diabetes Mellitus, Type 1] explode all trees | 7,574 |
| #12 | (diabetes mellitus, type 1 OR Type 1 diabetes OR type 1 diabetes mellitus):ti,ab,kw | 49,813 |
| #13 | (#11 OR #12) | 49,814 |
| #14 | (#7 AND #10 AND #13) + limits (with Publication Year from 2016 to 2024, with Cochrane Library publication date from May 2016 to May 2024, in Trials) | 146 |

**Critical Appraisal**

**Table S5**. Critical appraisal for RCT studies using the Mixed Methodology Assessment Tool (MMAT) version 2018

|  | **SECTION A** | | | **SECTION B** | | | | | **SECTION C** | | | **SECTION D** | |  | |
| --- | --- | --- | --- | --- | --- | --- | --- | --- | --- | --- | --- | --- | --- | --- | --- |
| **Authors** | **1** | **2** | **3** | **1*a*** | **1*b*** | **1*c*** | **2** | **3** | **1** | **2** | **3** | **1** | **2** | **Comments** |
| 1. Hermanns et al. (2019)16 | Y | Y | Y | N | N | Y | Y | Y | Y | Y | Y | Y | Y |  |
| 2. Smith et al. (2021)19 | Y | Y | Y | N | N | N | Y | Y | Y | N | CT1 | CT2 | CT3 | 1Applicability would depend on similarities in demographics, access to technology, and healthcare support systems.  2 More data would be needed on the intervention's effectiveness and cost-efficiency compared to current local practices.  3 The study suggests potential benefits in terms of adherence and glycemic control but also highlights the need for modifications to improve engagement. |
| 3. Yoo et al. (2022)4 | Y | Y | Y | N | N | N | Y | Y | Y | Y | Y | Y | Y |  |
| 4. Murata et al. (2023)14 | Y | Y | Y | N | N | N | Y | Y | Y | Y | Y | Y | Y |  |

Y=Yes, N=No, CT= Can’t Tell

| **SECTION A** |
| --- |
| 1. Did the study address a clearly formed question? |
| 2. Was the assignment of participants to interventions randomized? |
| 3. Were all participants who entered the study accounted for at its conclusion? |
| **SECTION B** |
| 1a. Were the participants ‘blind’ to intervention they were given?  1b. Were the investigators ‘blind’ to the intervention they were giving to participants?  1c. Were the people assessing/analyzing outcome/s ‘blinded’? |
| 2. Were the study groups similar at the start of the randomized controlled trial? |
| 3. Apart from the experimental intervention, did each study group receive the same level of care (that is, were they treated equally)? |
| **SECTION C** |
| 1. Were the effects of intervention reported comprehensively? |
| 2. Was the precision of the estimate of the intervention or treatment effect reported? |
| 3.Do the benefits of the experimental intervention outweigh the harms and costs? |
| **SECTION D** |
| 1.Can the results be applied to your local population/in your context? |
| 2. Would the experimental intervention provide greater value to the people in your care than any of the existing interventions? |

**Table S6**. Critical appraisal for qualitative studies using the Mixed Methodology Assessment Tool (MMAT)

| **Studies N=1** | | | | | | | | |
| --- | --- | --- | --- | --- | --- | --- | --- | --- |
| ***Author*** | ***Type of study*** | a. | b. | 1 | 2 | 3 | 4 | 5 |
| Allen A.N. et al. (2023)20 | Qualitative descriptive study | Yes | Yes | Yes | Yes, semi-structured interviews and constant comparison methods used​ | Yes, themes derived from the data​ | Yes, findings linked with themes | Yes, COREQ guidelines used for coherence​ |

1. Are there clear research questions?
2. Do the collected data allow to address the research questions?
3. Is the qualitative approach appropriate to answer the research question?
4. Are the qualitative data collection methods adequate to address the research question?
5. Are the findings adequately derived from the data?
6. Is the interpretation of results sufficiently substantiated by data?
7. Is there coherence between qualitative data sources, collection, analysis and interpretation?

**Table S7**. Critical appraisal for Quantitative non-randomized studies using the Mixed Methodology Assessment Tool (MMAT).

| **Studies N=4** | | | | | | | | |
| --- | --- | --- | --- | --- | --- | --- | --- | --- |
| ***Author*** | ***Type of study*** | a. | b. | 1 | 2 | 3 | 4 | 5 |
| 1. Schluter et al. (2021) 17 | Prospective multicenter study | Y (as the study aimed to evaluate the effectiveness and satisfaction of the SPECTRUM training program) | Y (as data on knowledge, satisfaction, and glycemic control were collected) | Y (adults with Type 1 diabetes were recruited from multiple diabetes centers in Germany) | Y (measurements included rtCGM knowledge, HbA1c, and satisfaction ratings, which align with the study's aims) | Y (though there were some dropouts, the study reports results on those who completed the program) | N (as the study does not extensively address potential confounding factors such as different health literacy levels across participants) | Y (the SPECTRUM program was delivered as structured, with all modules completed by most participants) |
| 2. Pemberton et al (2021) 18 | Prospective cohort study | Y (the study aims to evaluate the effectiveness of a structured education program for children and young people with Type 1 diabetes) | Y (as the study gathers outcome data on time in range, HbA1c, and other relevant diabetes metrics) | Y (the cohort includes a socioeconomically deprived population of children and young people with Type 1 diabetes) | Y (outcome measures such as time in range (TIR), hypoglycemia, and HbA1c were appropriate for evaluating CGM effectiveness) | Y (the study provides complete follow-up outcome data at six months) | CT (the study does not clearly indicate how confounders, such as baseline health differences, were managed in analysis) | Y (the CGM Academy education program was structured and delivered as planned) |
| 3. Pemberton. et al. (2022) 15 | Prospective study | Y (the study clearly aims to compare the clinical and cost-effectiveness of different education programs on glucose management​) | Y (the data collected on TIR, HbA1c, and other outcomes were sufficient to address the research questions​) | Y (participants were children with type 1 diabetes from diverse socioeconomic backgrounds) | Y (the measurements of TIR, TAR, HbA1c, and severe hypoglycemia episodes were appropriate) | Y (outcome data were collected comprehensively at baseline and 6 months) | Y (factors like therapy type, glucose monitoring, and socioeconomic status were considered​) | Y(both the face-to-face and virtual interventions were delivered as planned​) |
| 4. Raimond et al (2023) 21 | Observation study -Cohort study? | Y (as the study aims are clearly defined around education and intervention impact on diabetes management) | Y (as data collection aligns with evaluating intervention impacts) | Y (with a focus on adults with Type 1 diabetes in a controlled trial setting) | Y (covering glucose monitoring, HbA1c, and patient-reported outcomes) | Y (with a report on most patient-reported outcomes, though limited by a dropout rate) | N (due to limitations in accounting for all patient-related variables (mental health, language barriers) | Y (with structured training and consistent follow-up visits) |

Y=YES, N=NO, CT=CAN’T TELL

Screening questions for all types of studies:

1. Are there clear research questions?
2. Do the collected data allow to address the research questions?
3. Are the participants representative of the target population?
4. Are the measurements appropriate regarding both the outcome and the intervention (or exposure)?
5. Are there complete outcome data?
6. Are the confounders accounted for in the design and analysis?
7. During the study period, is the intervention administered (or exposure occurred) as intended?
